# Supplementary material for: Adaptive selection in the evolution of programmed cell death-1 and its ligands in vertebrates
Source: publisher site journal article supplement (doi:10.18632/aging.102827), 2020-02-11
Supplement: Supplementary file [file aging-v12i4-102827-supplementary-material-SD1.pdf]

## SUPPLEMENTARY FIGURES

```

1           11           21           31           41
MQIPQAPWPV VWA1VLQ2LGWR3 PGWFLDSPDR PWN4PPT5FSPA6 L7L8V9V10TE11GD12NA13
51          61          71          81          91
T14F15T16C17S18F19S20N21T22S23 E24S25F26V27L28N29W30Y31R32M33 S34P35S36N37Q38T39D40K41L42A43 A44F45P46E47D48R49S50Q51P52G53 Q54D55C56R57F58R59V60T61Q62L63
101         111        121        131        141
P64N65G66R67D68F69H70M71S72V73 V74R75A76R77R78N79D80S81G82T83 Y84L85C86G87A88I89S90L91A92P93 K94A95Q96I97K98E99S100L101R102A103 E104L105R106V107T108E109R110R111A112E113
151        161        171        181        191
V114P115T116A117H118P119S120P121S122 R123P124A125G126Q127F128Q129T130L131V132 V133G134V135V136G137G138L139L140G141S142 L143V144L145L146V147W148V149L150A151V152 I153C154S155R156A157A158R159G160T161I162
201        211        221        231        241
G163A164R165R166T167G168Q169P170L171K172 E173D174P175S176A177V178P179V180F181S182 V183D184Y185G186E187L188D189F190Q191W192 R193E194K195T196P197E198P199P200V201P202 C203V204P205E206Q207T208E209Y210A211T212
251        261        271        281
I213V214F215P216S217G218M219G220T221S222 S223P224A225R226R227G228S229A230D231G232 P233R234S235A236Q237P238L239R240P241E242 D243G244H245C246S247W248E249L250

```

### Legend:

The selection scale:

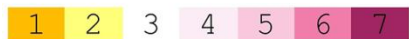

Positive selection      Purifying selection

**Supplementary Figure 1. Detection of positive/purifying selection in PD1 homologous sequences from vertebrates.** Color-coded results of Selecton analyses of human PD1, compared to sequences from 52 aligned nucleotide coding sequences. Selection pressure was measured on sequences using mechanistic-empirical combination (MEC) model of Selecton version 2.2. Yellow and brown highlights represent positive selection, grey and white highlights represent a neutral selection and purple highlight represent purifying selection on codons.

```

1          11          21          31          41
M R I F A V F I F M T Y W H L L N A E T V T V P K D L Y V V E Y G S N M T I E C K F P V E K Q L D L
51         61         71         81         91
A A L I V Y W E M E D K N I I Q F V H G E E D L K V Q H S S Y R Q R A R L L K D Q L S L G N A A L Q
101        111       121       131       141
I T D V K L Q D A G V Y R C M I S Y G G A D Y K R I T V K V N A P Y N K I N Q R I L V V D P V T S E
151       161       171       181       191
H E L T C Q A E G Y P K A E V I W T S S D H Q V L S G K T T T T N S K R E E K L F N V T S T L R I N
201       211       221       231       241
T T T N E I F Y C T F R R L D P E E N H T A E L V I P E L P L A H P P N E R T H L V I L G A I L L C
251      261      271      281
L G V A L T F I F R L R K G R M M D V K K C G I Q D T N S K K Q S D T H L E E T

```

**Legend:**

**The selection scale:**

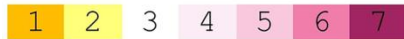

Positive selection      Purifying selection

**Supplementary Figure 2. Detection of positive/purifying selection in PD-L1 homologous sequences from vertebrates.** Color-coded results of Selecton analyses of human PD-L1, compared to sequences from 58 aligned nucleotide coding sequences. Selection pressure was measured on sequences using mechanistic-empirical combination (MEC) model of Selecton version 2.2. Yellow and brown highlights represent positive selection, grey and white highlights represent a neutral selection and purple highlight represent purifying selection on codons.

```

1           11           21           31           41
MIFLLMLSL ELQLHQIAAL FTVTVPKELY IIEHGSNVTL ECNEDTGSHV
51          61          71          81          91
NLGAI TASLQ KVENDTSPHR ERATLLEEQL PLGKASFHIP QVQVRDEGQY
101         111        121        131        141
QCI I IYGVAW DYKYLTLKVK ASYRKINTHI LKVPETDEVE LTCQATGYPL
151        161        171        181        191
AEVSWPNVSV PANTSHSRTP EGLYQVTSVL RLKPPPGRNF SCVFWNTHVR
201        211        221        231        241
ELT LASIDLQ SQMEPRTHPT WLLHIFIPFC IIAFIFIATV IALRKQLCQK
251        261        271
LYSKD TTKR PVT TTKREVN SAI

```

**Legend:**

The selection scale:

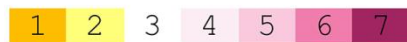

Positive selection      Purifying selection

**Supplementary Figure 3. Detection of positive/purifying selection in PD-L2 homologous sequences from vertebrates.** Color-coded results of Selecton analyses of human PD-L2, compared to sequences from 56 aligned nucleotide coding sequences. Selection pressure was measured on sequences using mechanistic-empirical combination (MEC) model of Selecton version 2.2. Yellow and brown highlights represent positive selection, grey and white highlights represent a neutral selection and purple highlight represent purifying selection on codons.

# ConSurf Results

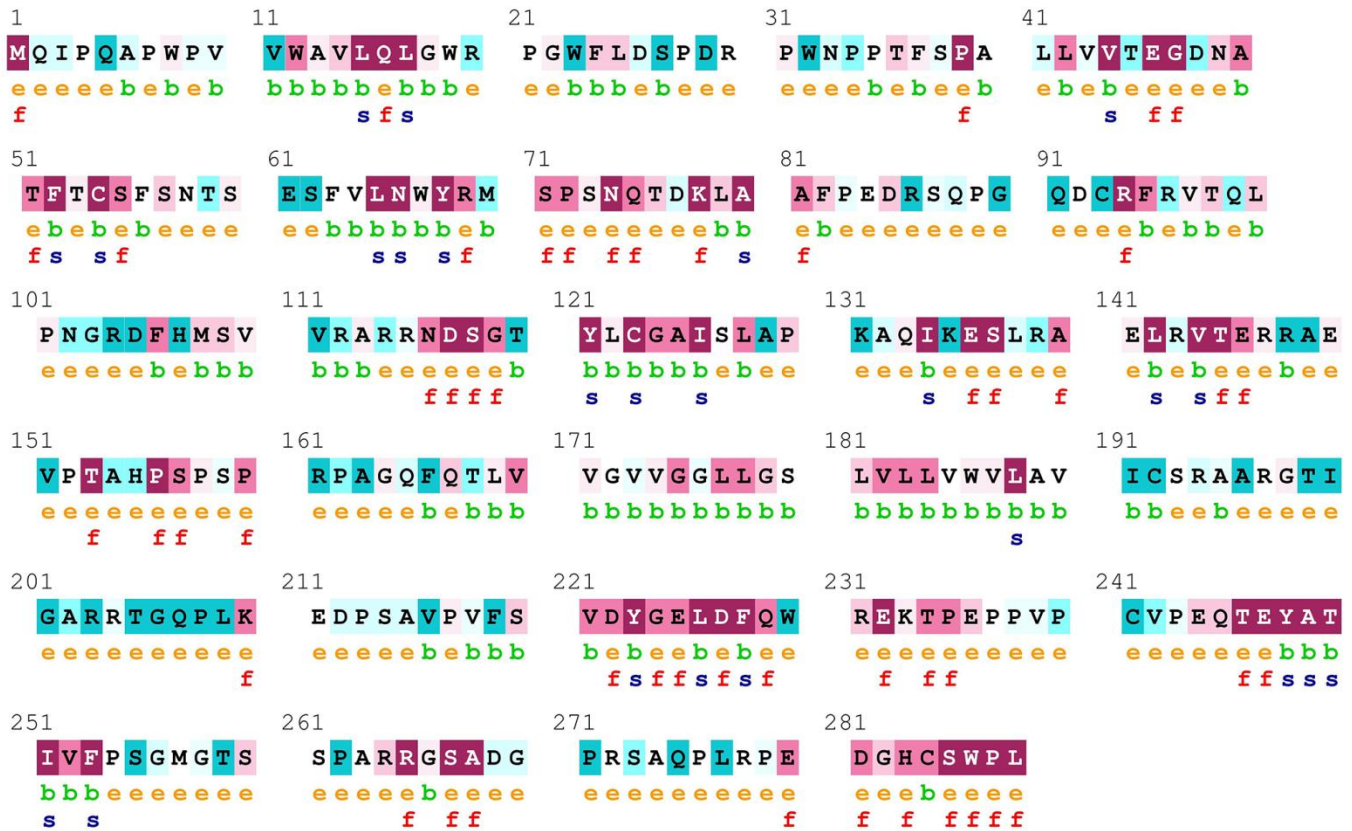

The conservation scale:

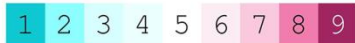

Variable Average Conserved

- e - An exposed residue according to the neural-network algorithm.
- b - A buried residue according to the neural-network algorithm.
- f - A predicted functional residue (highly conserved and exposed).
- s - A predicted structural residue (highly conserved and buried).

**Supplementary Figure 4. ConSurf output of PD1, using the UniRef90 protein database.** Colors of the ConSurf output indicate the level of sequence conservation. Purple indicates conservation and blue indicates variability. Residues are predicted to be exposed (e), buried (b), highly conserved and exposed (f), or highly conserved and buried, (s).

# ConSurf Results



The conservation scale:



Variable Average Conserved

- e - An exposed residue according to the neural-network algorithm.
- b - A buried residue according to the neural-network algorithm.
- f - A predicted functional residue (highly conserved and exposed).
- s - A predicted structural residue (highly conserved and buried).

**Supplementary Figure 5. ConSurf output of PD-L1, using the UniRef90 protein database.** Colors of the ConSurf output indicate the level of sequence conservation. Purple indicates conservation and blue indicates variability. Residues are predicted to be exposed (e), buried (b), highly conserved and exposed (f), or highly conserved and buried, (s).

# ConSurf Results

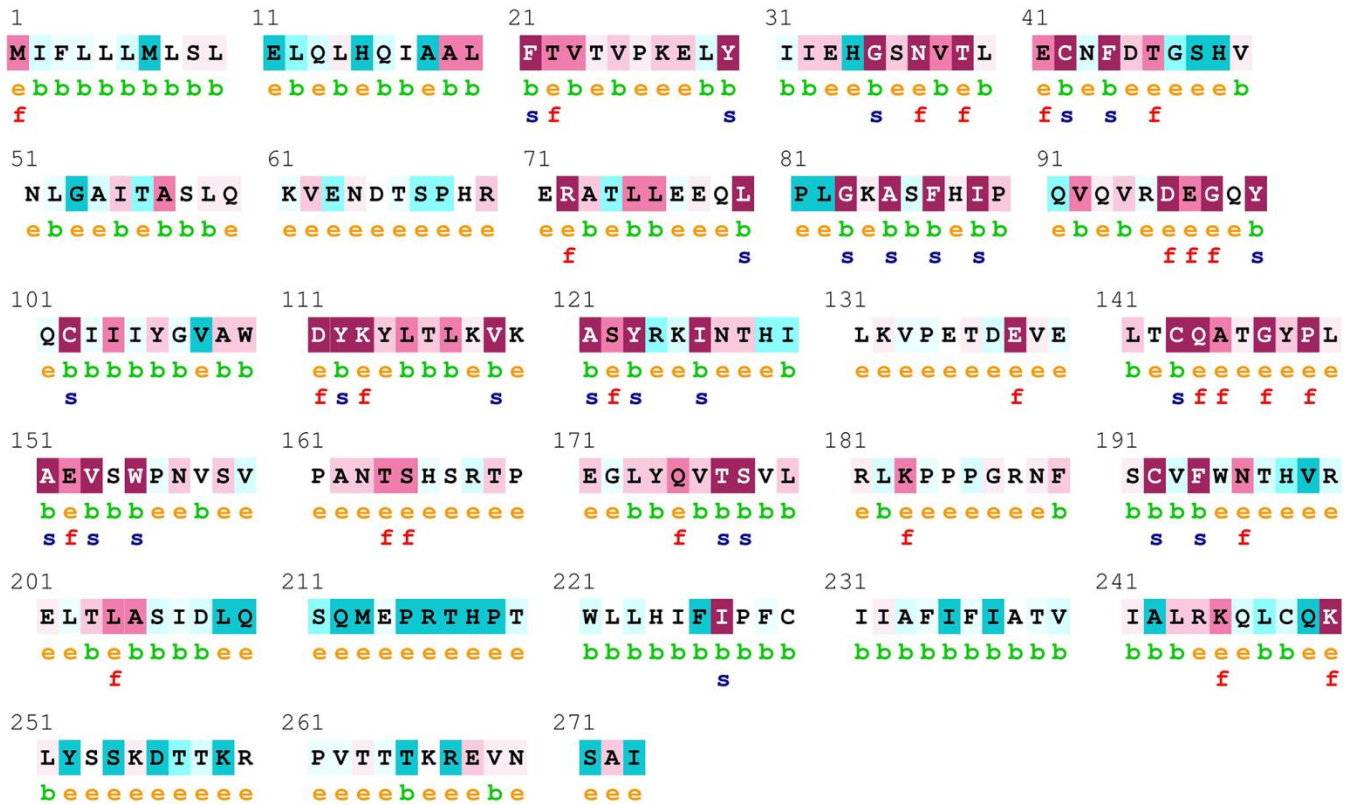

The conservation scale:



Variable Average Conserved

- e - An exposed residue according to the neural-network algorithm.
- b - A buried residue according to the neural-network algorithm.
- f - A predicted functional residue (highly conserved and exposed).
- s - A predicted structural residue (highly conserved and buried).

**Supplementary Figure 6. ConSurf output of PD-L2, using the UniRef90 protein database.** Colors of the ConSurf output indicate the level of sequence conservation. Purple indicates conservation and blue indicates variability. Residues are predicted to be exposed (e), buried (b), highly conserved and exposed (f), or highly conserved and buried, (s).

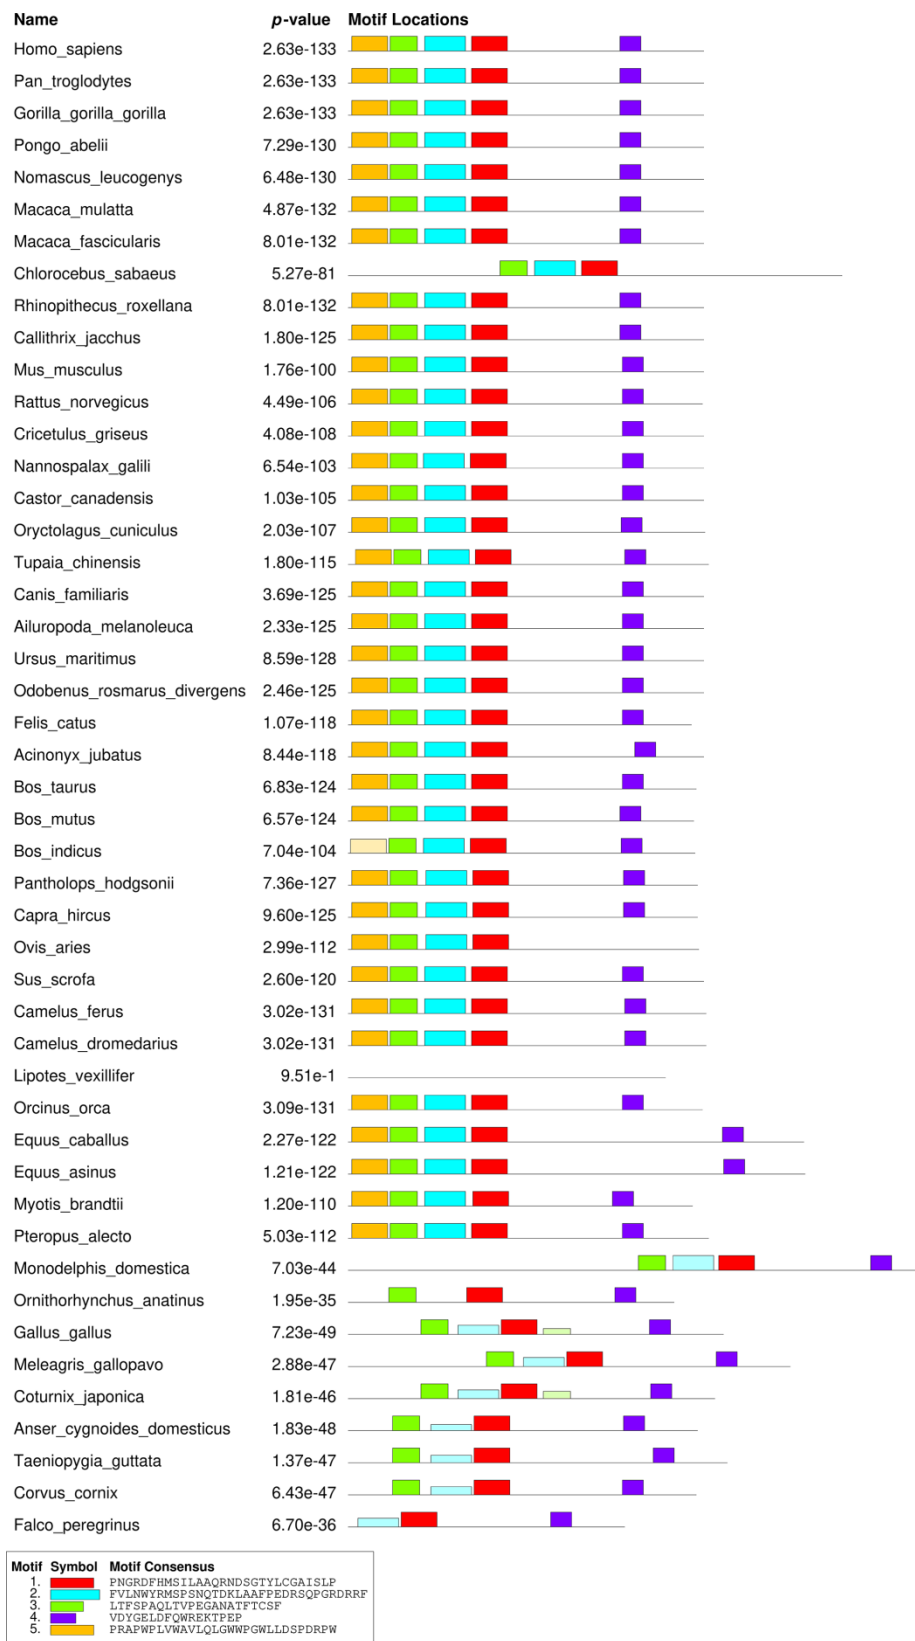

**Supplementary Figure 7. Motif distribution of PD1 gene in the vertebrate species.** Motifs of PD1 gene from 52 species are predicted using MEME suite (<http://meme.nbcr.net/meme/>) based on amino acids sequences. All sequences are separated by 5 conservative motifs with colors, including motif 1 (red), motif 2 (cyan), motif 3 (green), motif 4 (purple) and motif 5 (brown).

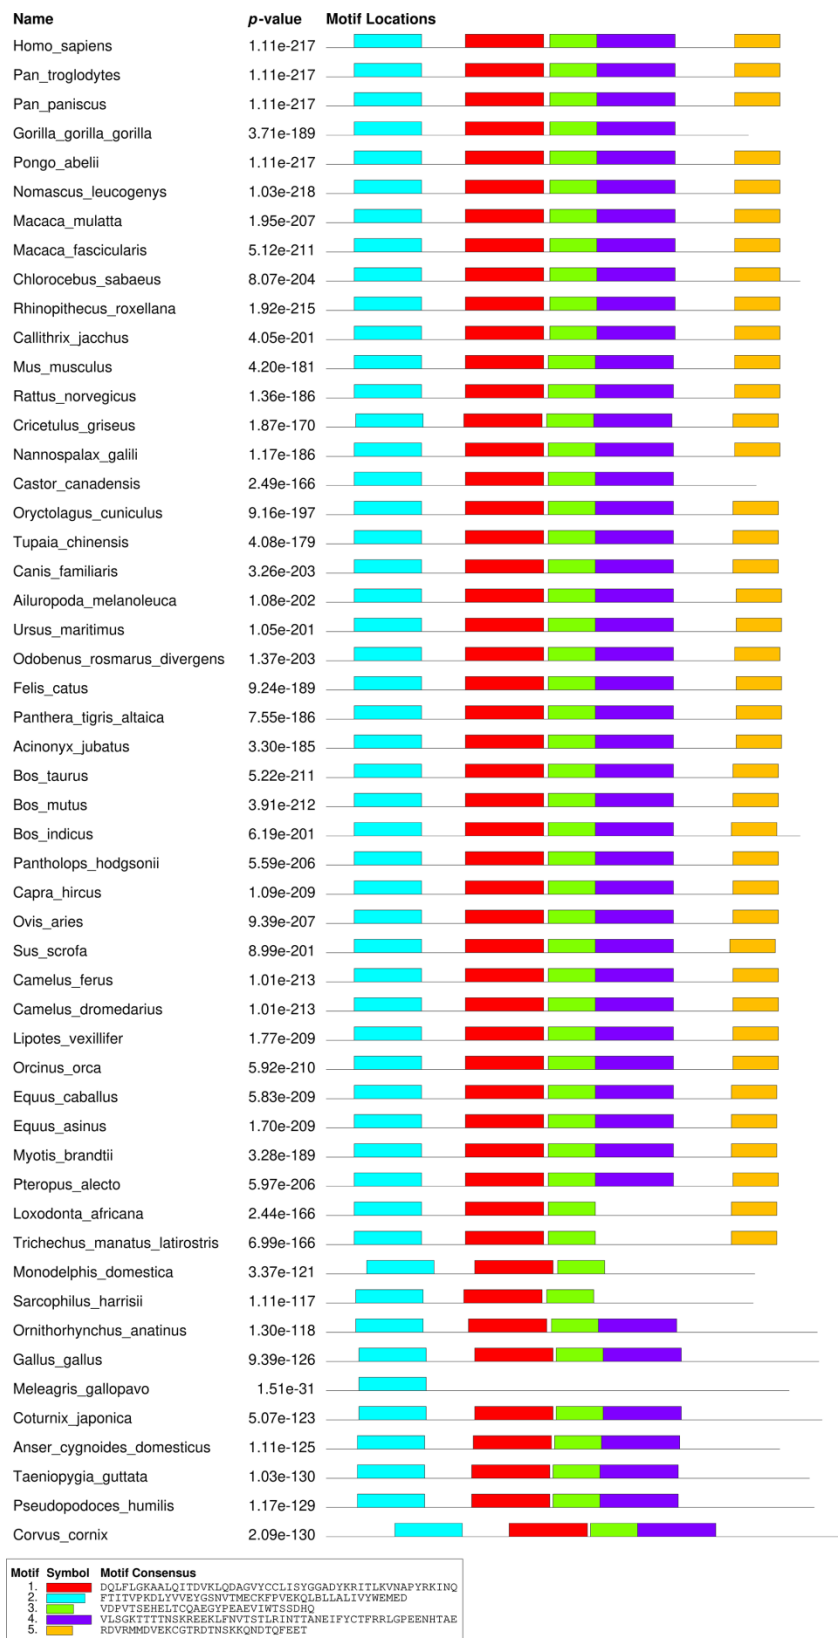

**Supplementary Figure 8. Motif distribution of PD-L1 gene in the vertebrate species.** Motifs of PD-L1 gene from 58 species are predicted using MEME suite (<http://meme.nbcr.net/meme/>) based on amino acids sequences. All sequences are separated by 5 conservative motifs with colors, including motif 1 (red), motif 2 (cyan), motif 3 (green), motif 4 (purple) and motif 5 (brown).



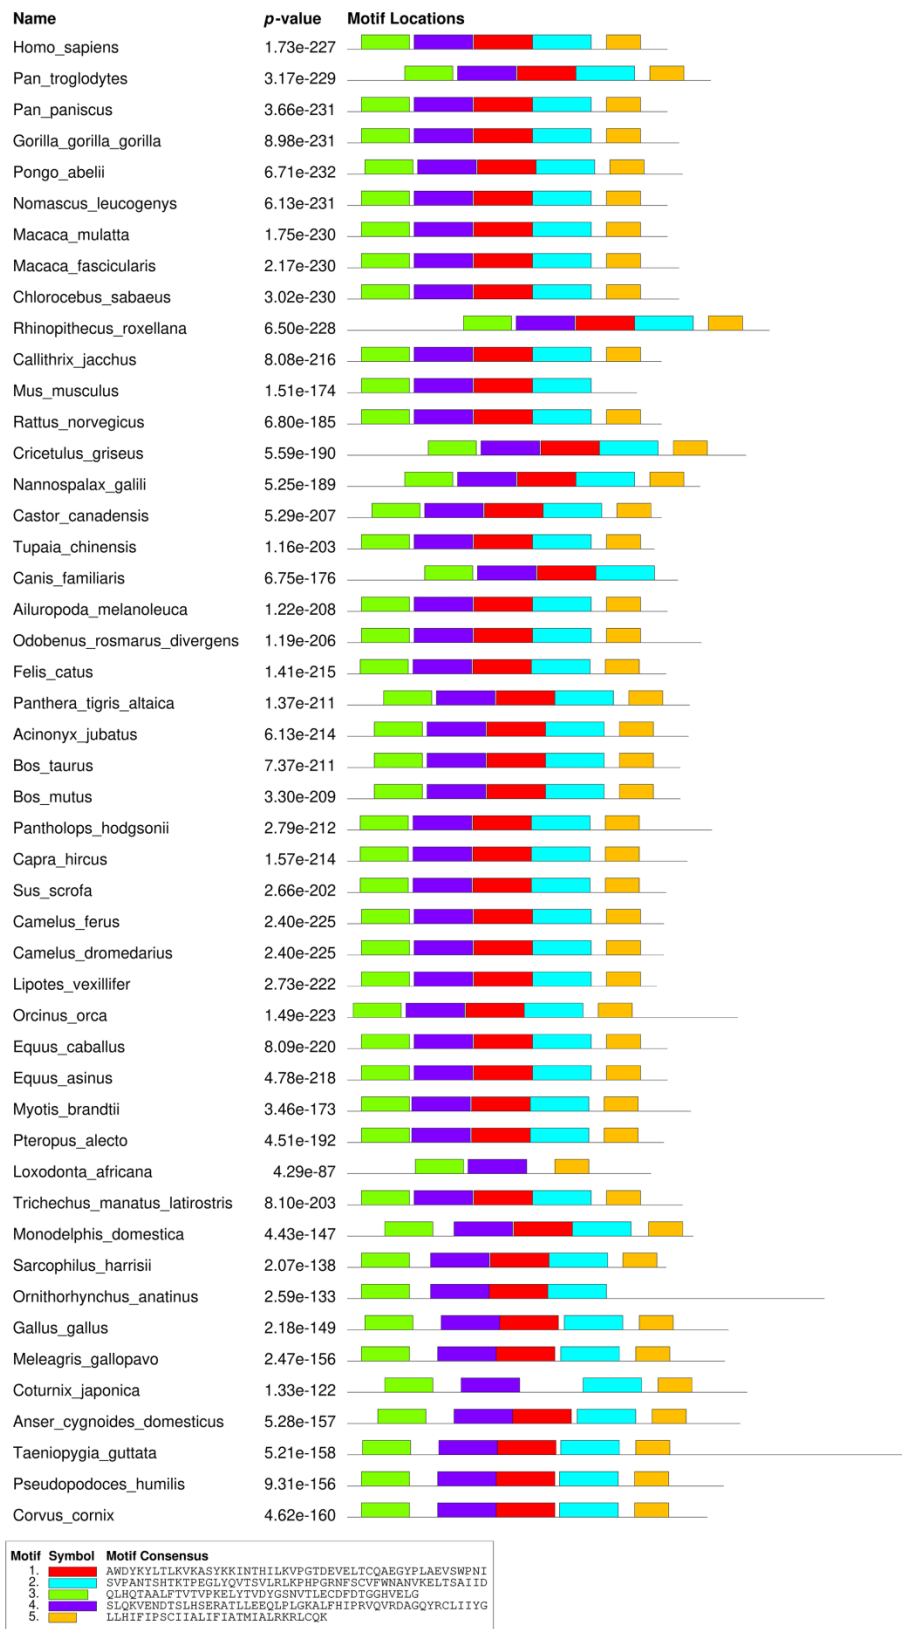

**Supplementary Figure 9. Motif distribution of PD-L2 gene in the vertebrate species.** Motifs of PD-L2 gene from 56 species are predicted using MEME suite (<http://meme.nbcr.net/meme/>) based on amino acids sequences. All sequences are separated by 5 conservative motifs with colors, including motif 1 (red), motif 2 (cyan), motif 3 (green), motif 4 (purple) and motif 5 (brown).

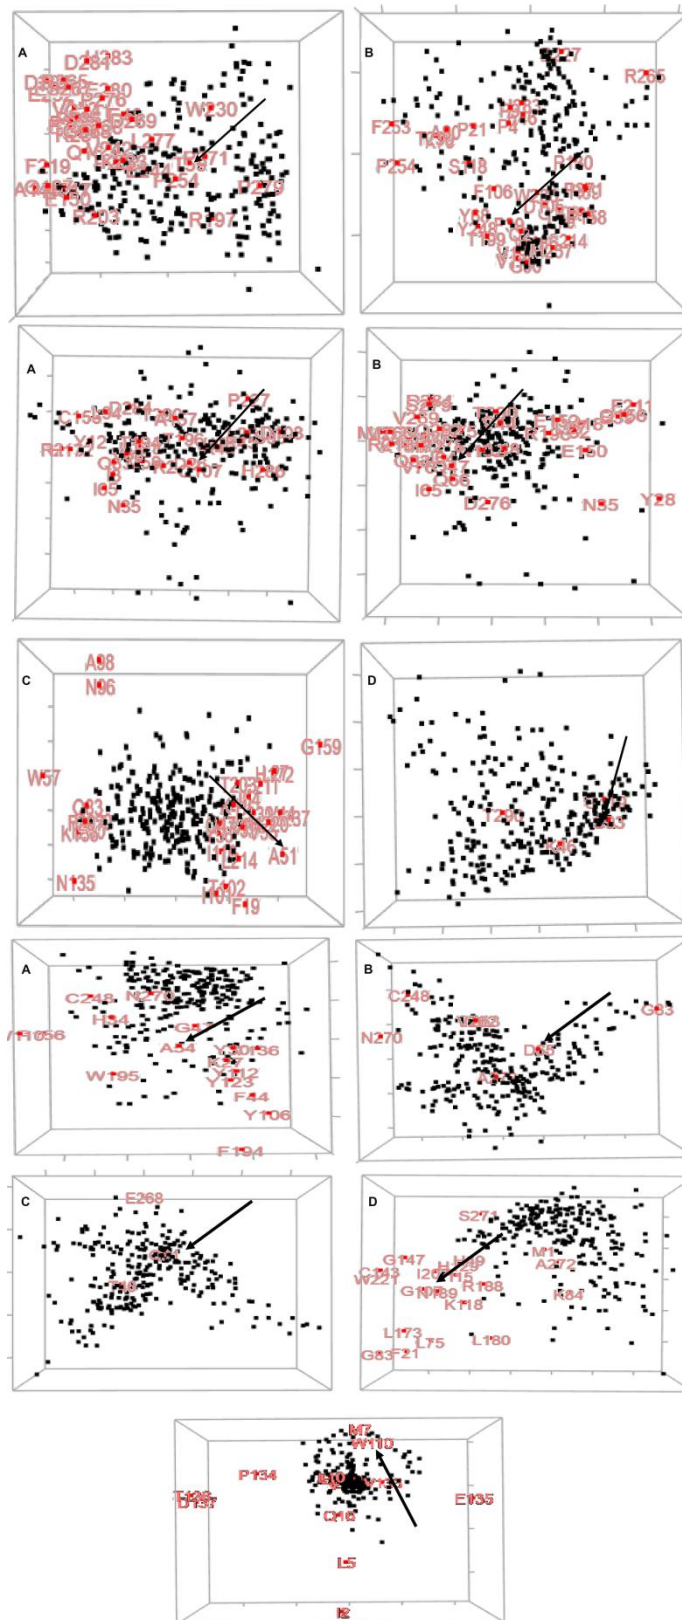

**Supplementary Figure 10. 3D multidimensional scaling (MDS) scatterplots of co-varying residues in human PD1, PD-L1, and PD-L2. (A)** Highlighted red are the residues corresponding to the positively selected residue. Both black and red dots can be optionally labeled with the residue identifiers.

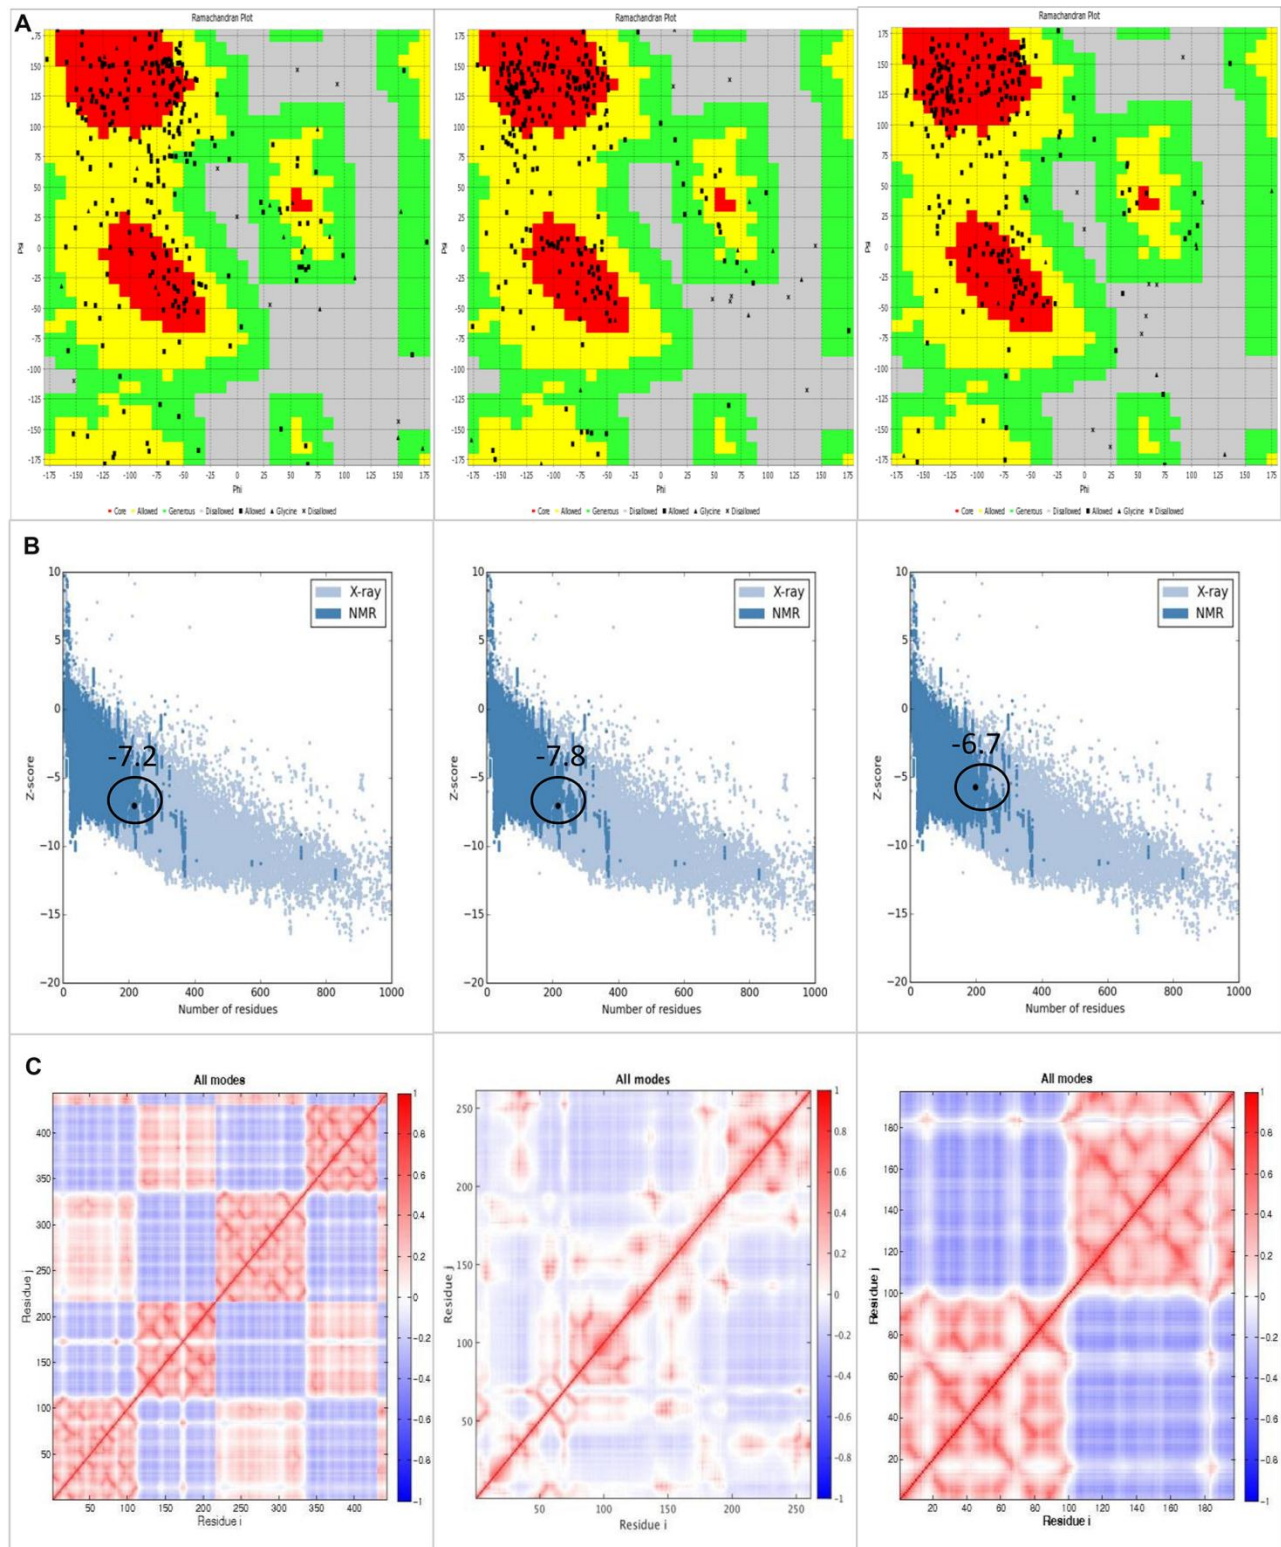

**Supplementary Figure 11.** (A) Ramachandran plot analysis of PD1, PDL1 and PDL2 proteins. The backbone conformation angles for respective residue in the modeled protein crystal structures. Red color indicates the core region, yellow indicates allowed region, green is allowed region, and grey is disallowed region. (B) Z-score displays the quality analysis of predicted structures. (C) The cross-correlation analysis of all predicted structures. Positive correlations are plotted in the upper left triangle and negative correlations in the lower right triangle. Open squares: functional hydrophobic and negative residues.
